# Supplementary material for: Structural variation from 1D to 3D: effect of metal centers on the construction of metal–organic coordination polymers with N-(1H-tetrazol-5-yl)benzamide ligand
Source: Royal Society of Chemistry journal article supplement (doi:10.1039/c003502e), 2010-01-01
Supplement: c003502e.pdf [file c003502e.pdf]

*Electronic supplementary information (ESI) available:*

## Structural Variation from 1D to 3D: Effect of Metal Centers on the Construction of Metal-Organic Coordination Polymers with N-(1H-tetrazol-5-yl)benzamide ligand

Yu-Bo Wang,<sup>a</sup> Dong-Sheng Liu,<sup>ab</sup> Tong-Hen Pan,<sup>a</sup> Qian Liang,<sup>a</sup> Xi-He Huang,<sup>a</sup> Shu-Ting Wu<sup>a</sup> and Chang-Cang Huang<sup>\*a</sup>

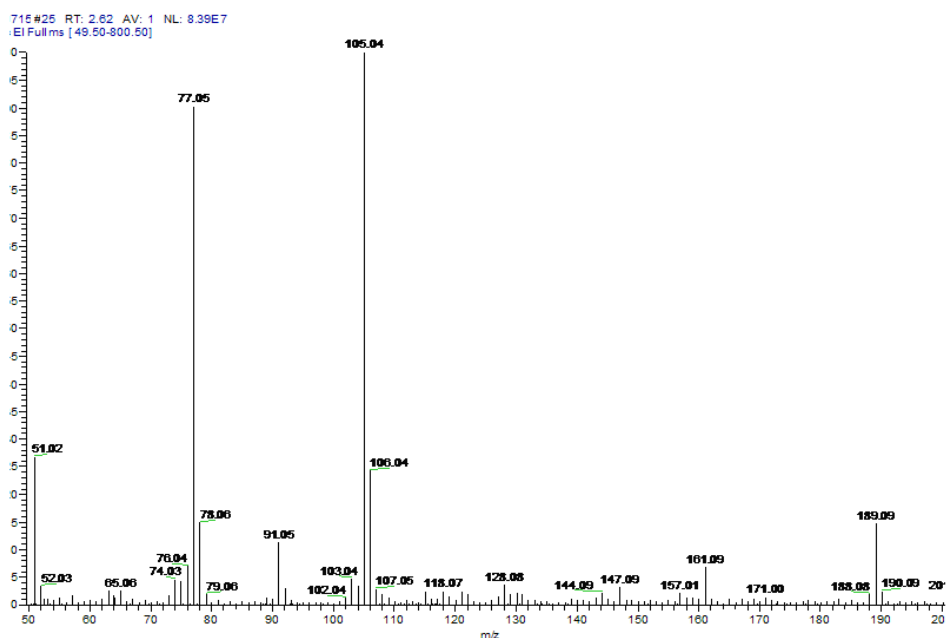

Figure S1 The MS of the HL.

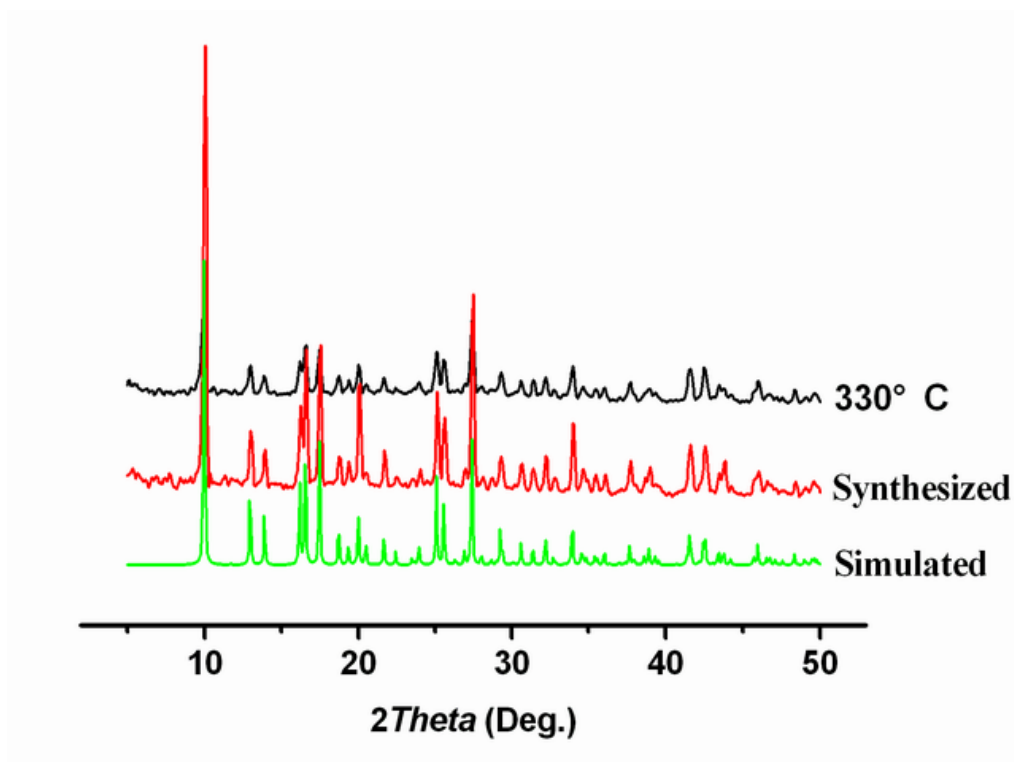

Figure S2-1 Power XRD patterns of the products for 1.

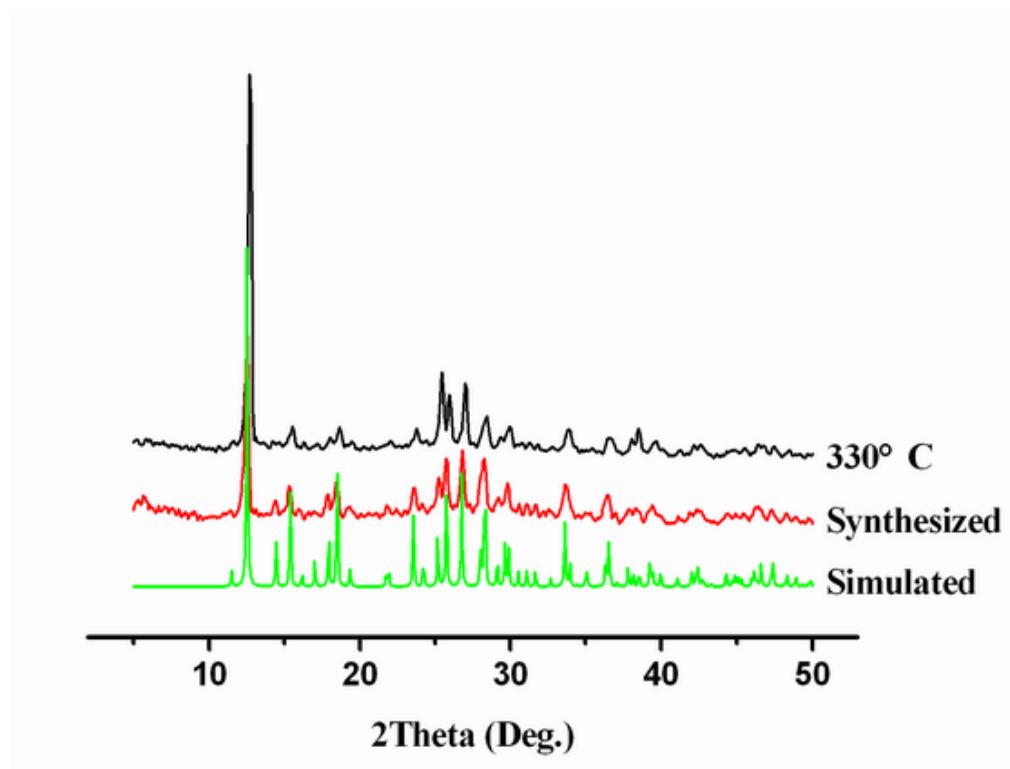

Figure S2-2 Power XRD patterns of the products for 2.

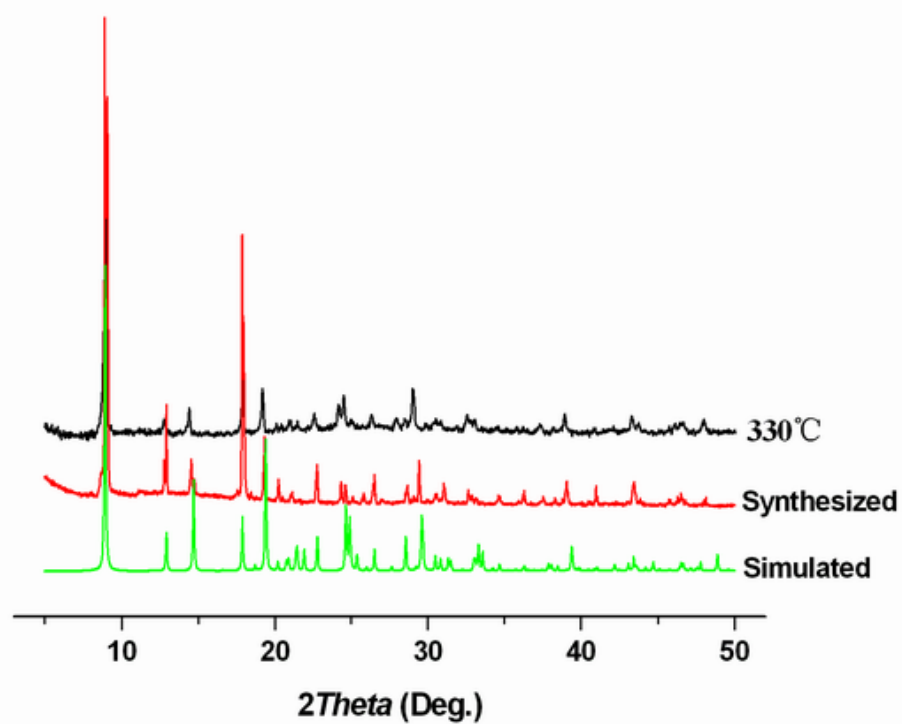

Figure S2-3 Power XRD patterns of the products for 3.

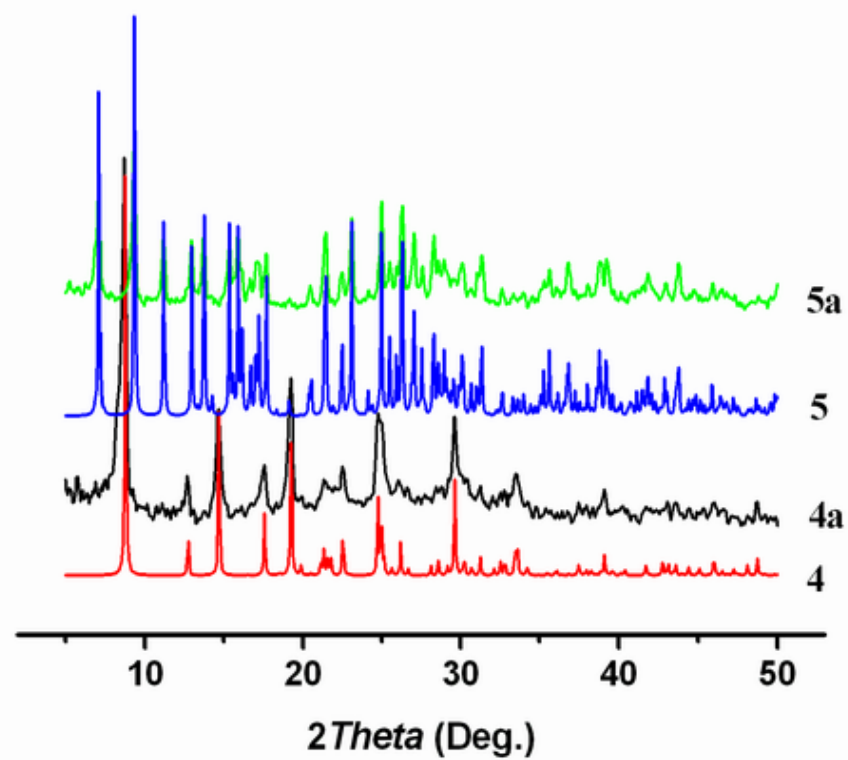

Figure S2-4 Power XRD patterns of the products for 4 and 5.

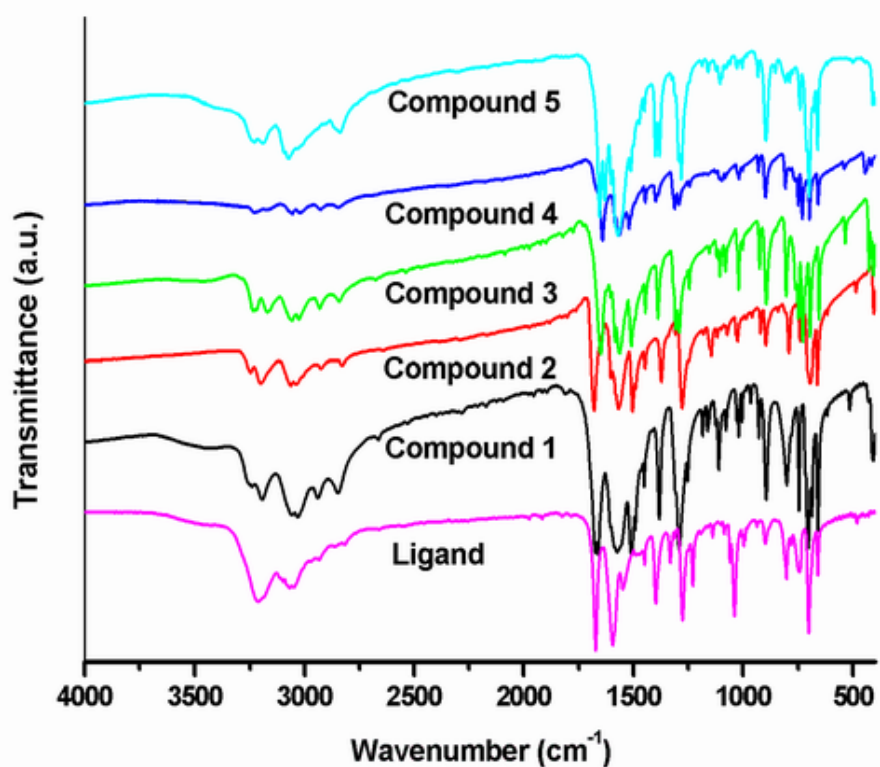

Figure S3 The IR spectra of ligand and compounds 1-5.

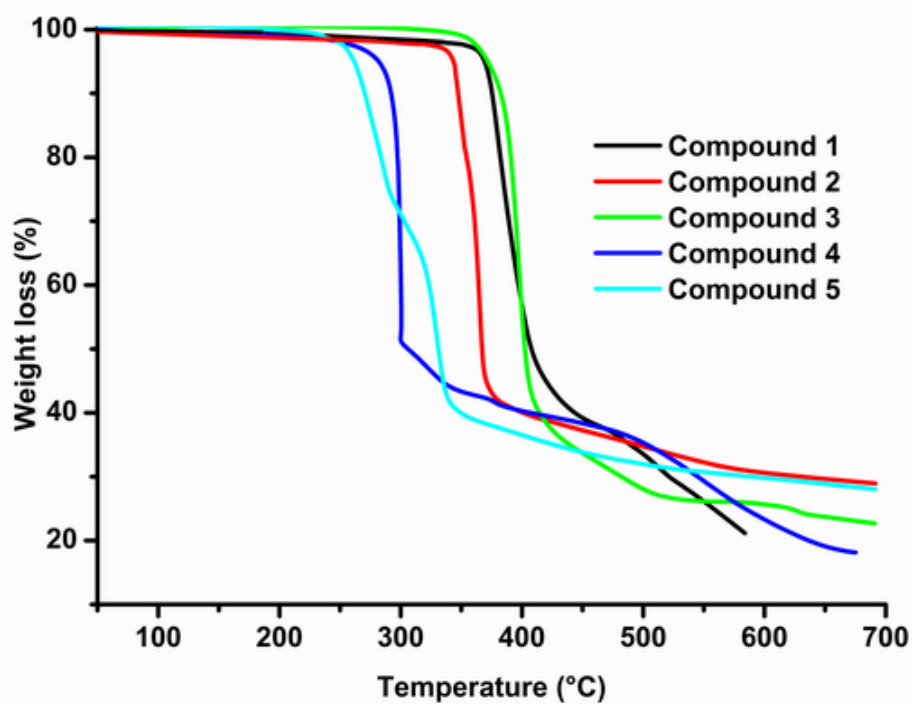

Figure S4 TGA diagrams of compounds 1-5.
